# Supplementary material for: No Evidence of Harms of Probiotic Lactobacillus rhamnosus GG ATCC 53103 in Healthy Elderly—A Phase I Open Label Study to Assess Safety, Tolerability and Cytokine Responses
Source: PubMed Central journal article supplement (PMC4249962; doi:10.1371/journal.pone.0113456), 2014-12-01
Supplement: pone.0113456.s004.pdf [file pone.0113456.s004.pdf]

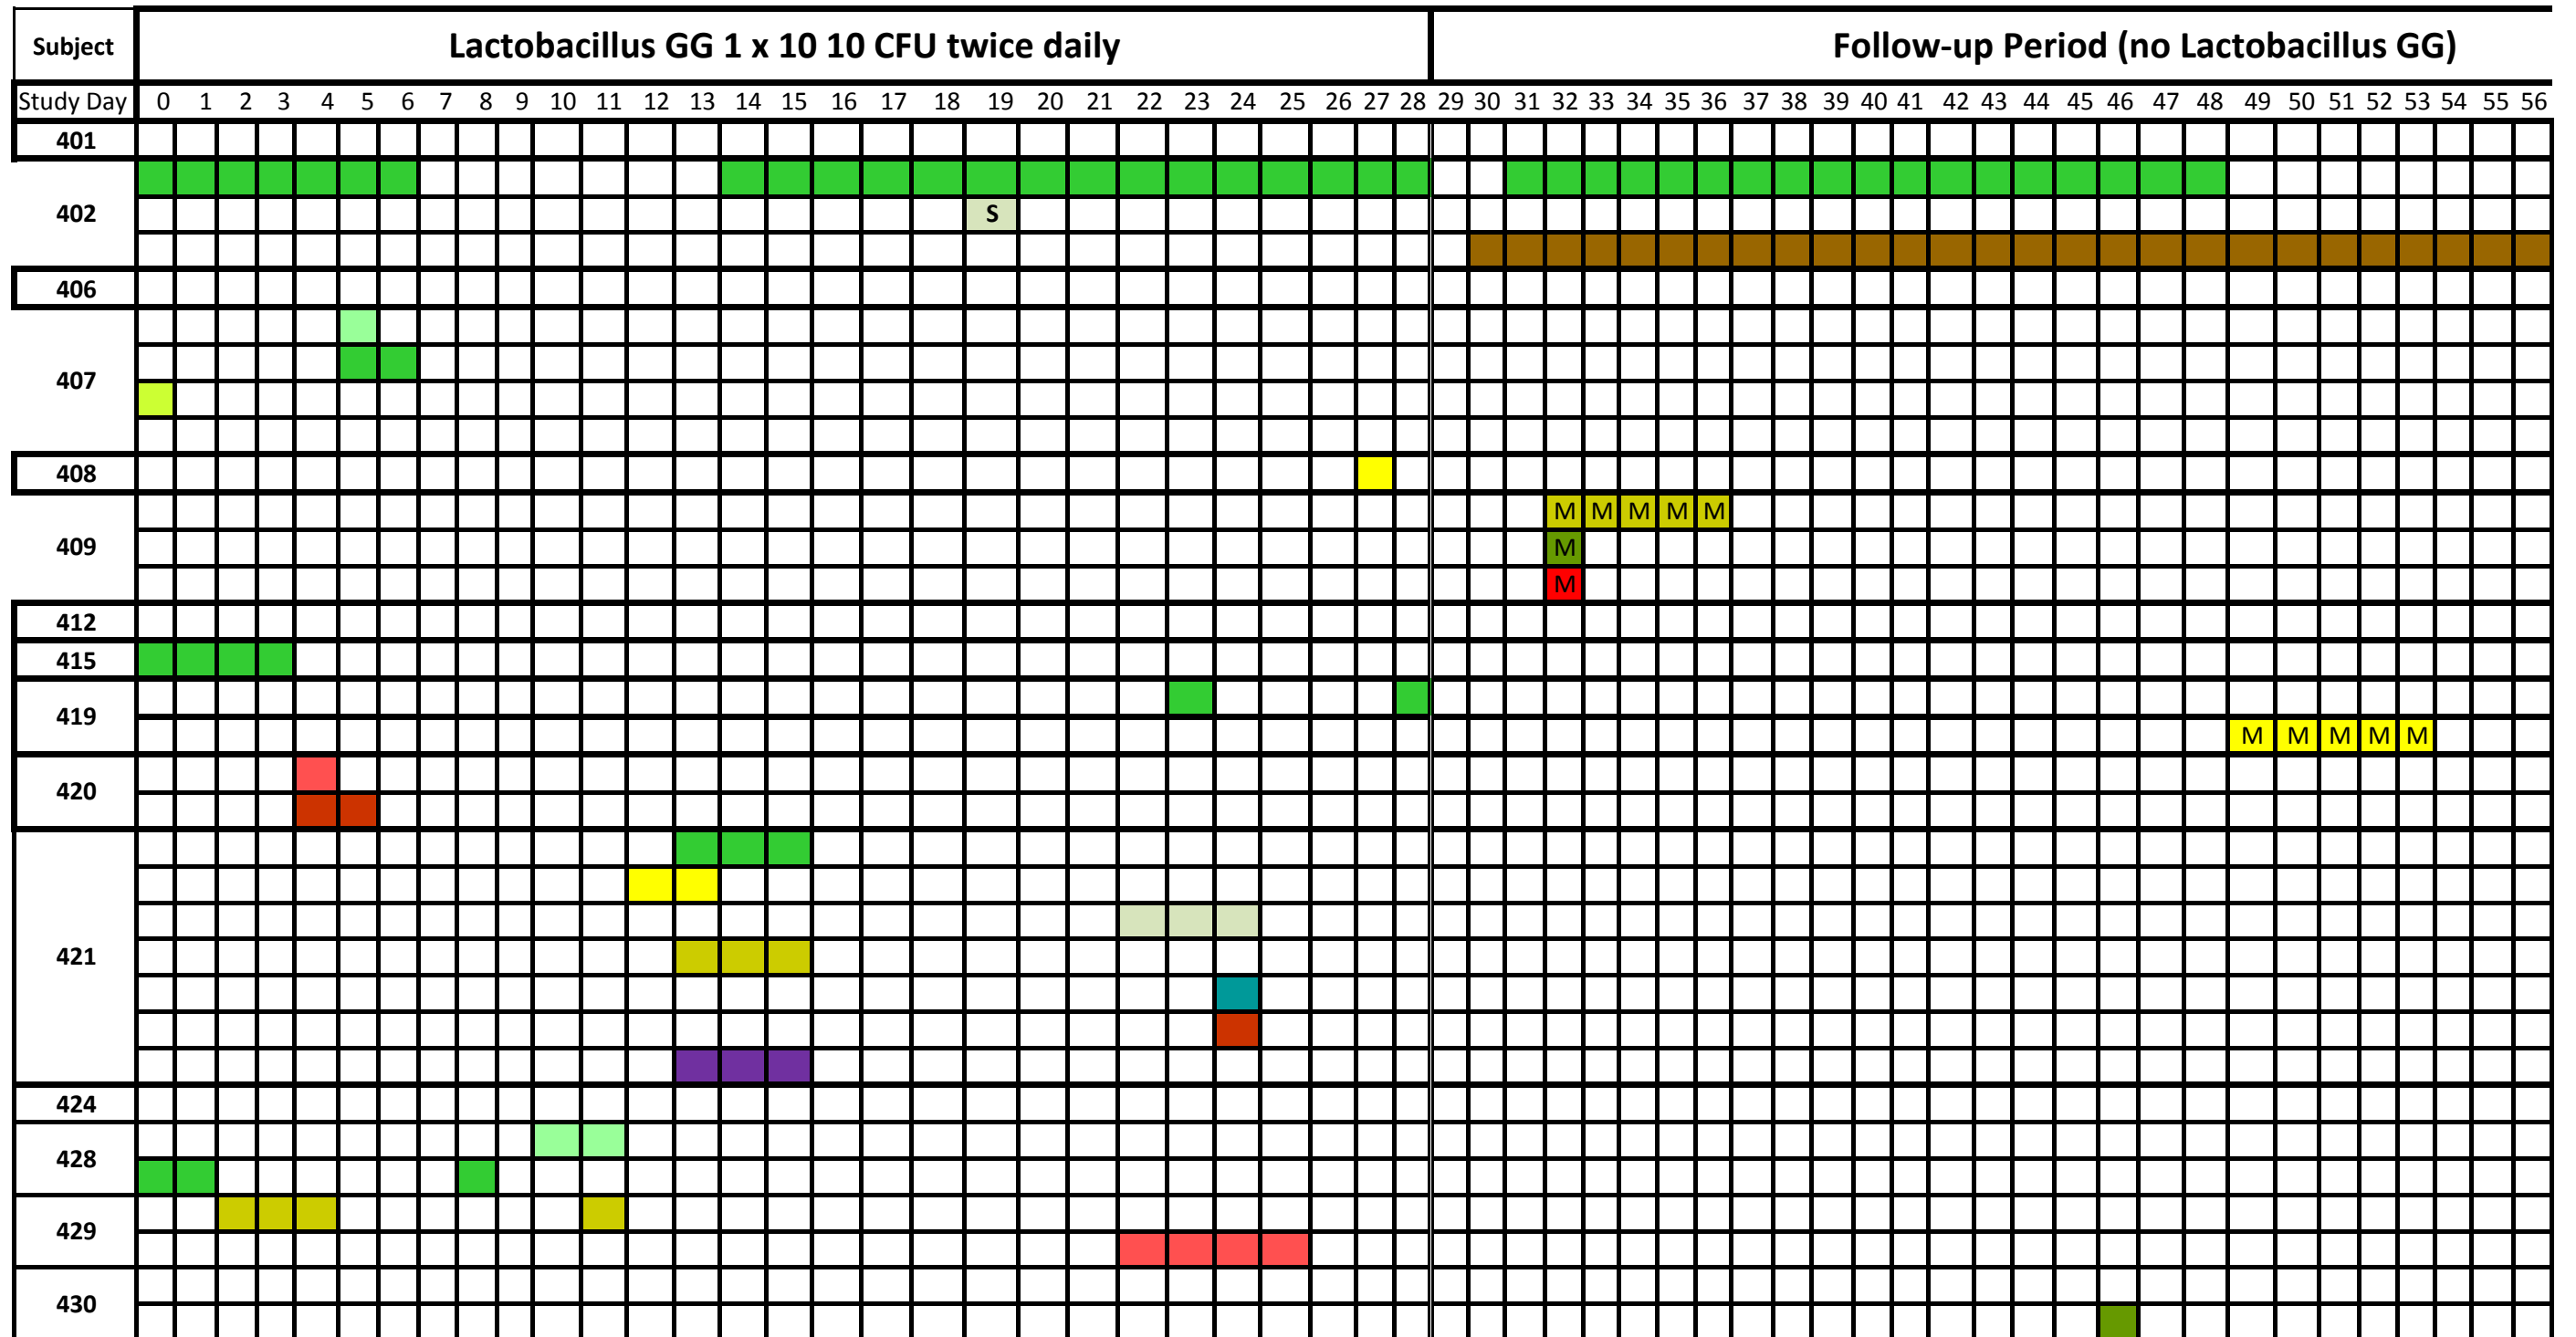

Symptoms prompted in daily diary, telephone calls and study visits

- |             |                        |                              |                              |                             |                         |                                     |
|-------------|------------------------|------------------------------|------------------------------|-----------------------------|-------------------------|-------------------------------------|
| GI          | [Light Green] Bloating | [Green] Gas                  | [Yellow] Intestinal rumbling | [Yellow] Diarrhea           | [Orange] Blood in stool | [Light Green] Abdominal cramps/pain |
|             | [Yellow] Nausea        | [Green] Vomiting             | [Cyan] Loss of appetite      | [Dark Green] Abnormal taste | [Red] Heartburn         | [Orange] Constipation               |
| Respiratory | [Red] Fever            | [Pink] Runny nose/congestion | [Purple] Sore throat         | [Pink] Cough                | [Purple] Headache       | [Blue] Chills                       |
| Other       | [Brown] Skin Rash      |                              |                              |                             |                         | [Cyan] Muscle Aches                 |
- M** Moderate symptoms      **S** Severe symptoms      All other color coded symptoms are mild
